# Supplementary material for: DCID-mediated esterification of carboxylic acids with alcohols under mild conditions
Source: PubMed Central journal article supplement — RSC Adv. 2023 Sep 13;13(39):27385–90. doi: 10.1039/d3ra04048h (PMC10498154; doi:10.1039/d3ra04048h), 2023-09-13
Supplement: RA-013-D3RA04048H-s001.pdf [file RA-013-D3RA04048H-s001.pdf]

## Supporting Information

### **DCID-mediated Esterification of Carboxylic Acids with Alcohols under Mild Condition**

Farzaneh Nasiri<sup>a</sup>, Javad Mokhtari,<sup>a\*</sup> Salman Taheri,<sup>b</sup> Zohreh Mirjafary<sup>a</sup>

<sup>a</sup>*Department of Chemistry, Science and Research Branch, Islamic Azad University, P.O. Box 14515/775,*

*Tehran, Iran. Tel/Fax:00982144865777, E-mail: j.mokhtari@srbiau.ac.ir*

<sup>b</sup>*Chemistry & Chemical Engineering Research Center of Iran, P.O. Box 14335-186, Tehran, Iran*

## Dichloroimidazolidinedione (DCID) 2:

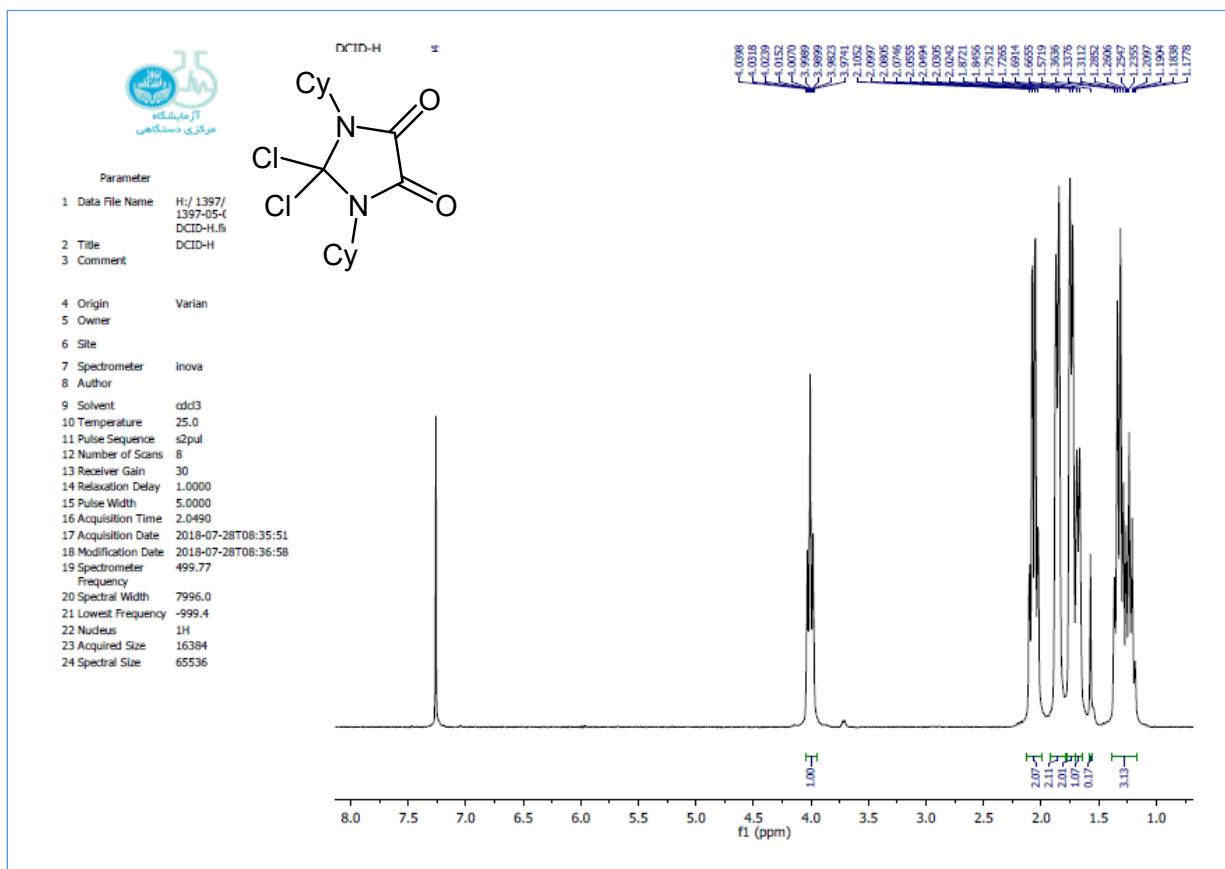

Fig. S1.  $^1\text{H-NMR}$  spectra (500 MHz,  $\text{CDCl}_3$ ) of DCID (2)

**Dichloroimidazolidinedione (DCID) (2):**

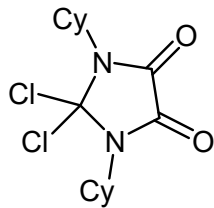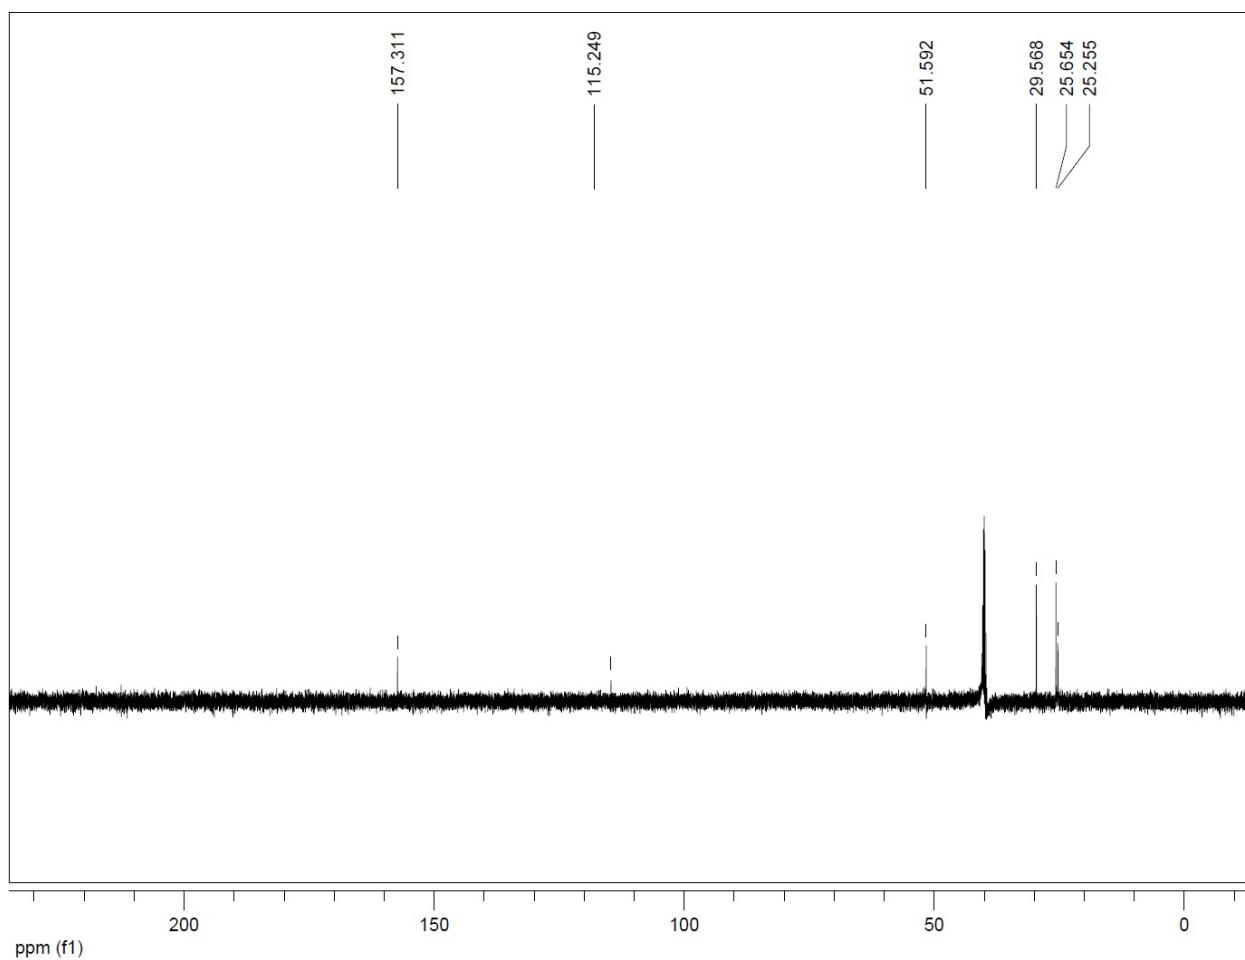

**Fig. S2.** <sup>13</sup>C-NMR spectra (100 MHz, DMSO-d<sub>6</sub>) of DCID

**2-chloro-1,3-dicyclohexyl-4,5-dioxoimidazolidin-2-yl benzoate (3a):**

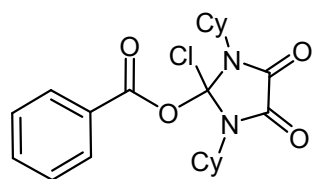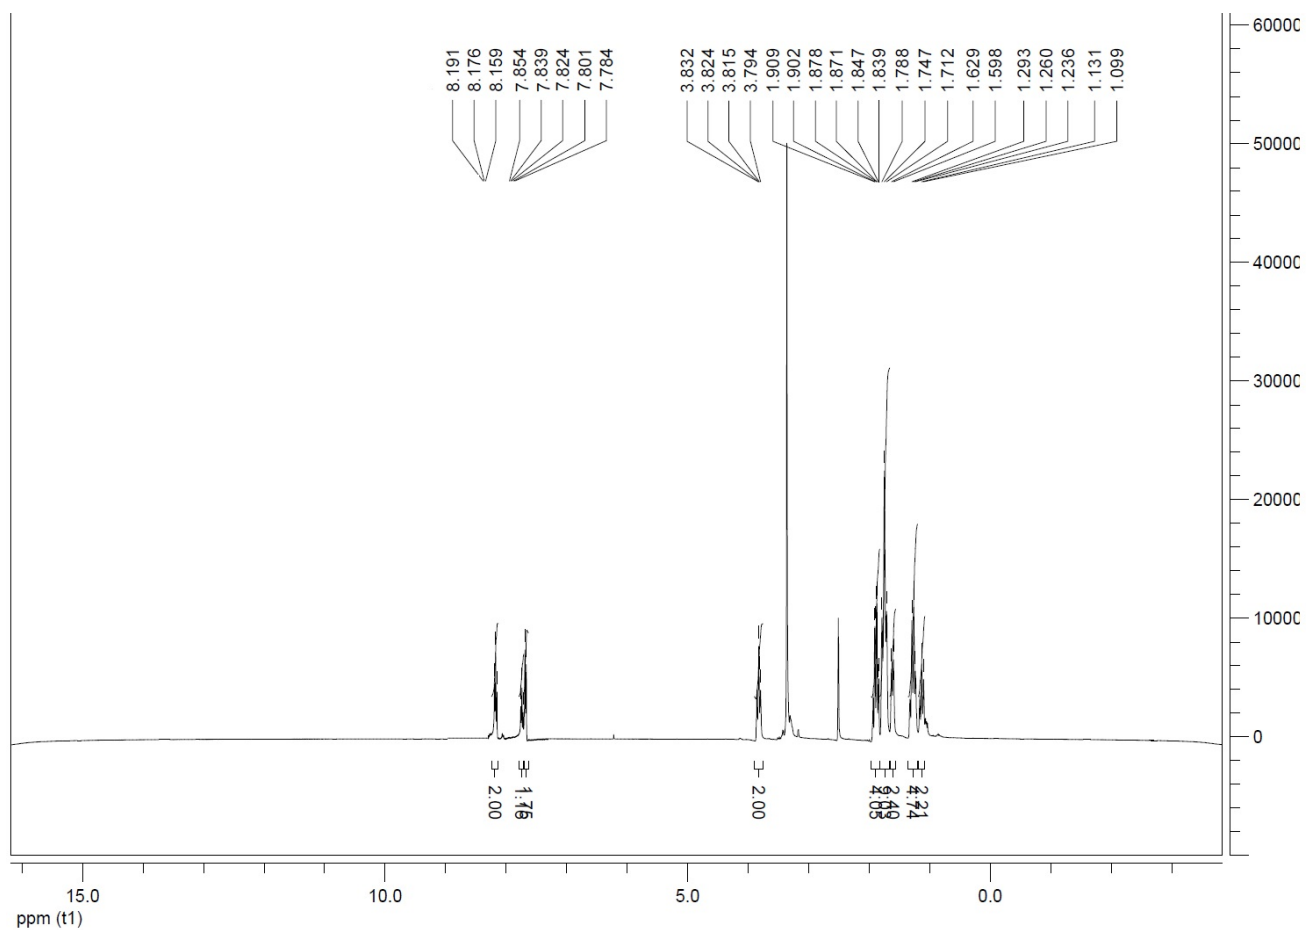

**Fig. S3.**  $^1\text{H-NMR}$  spectra (400 MHz,  $\text{DMSO-d}_6$ ) of 2-chloro-1,3-dicyclohexyl-4,5-dioxoimidazolidin-2-yl benzoate

**2-chloro-1,3-dicyclohexyl-4,5-dioximidazolidin-2-yl benzoate (3a):**

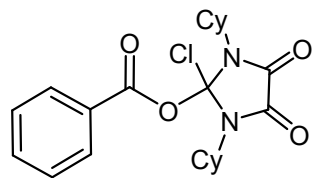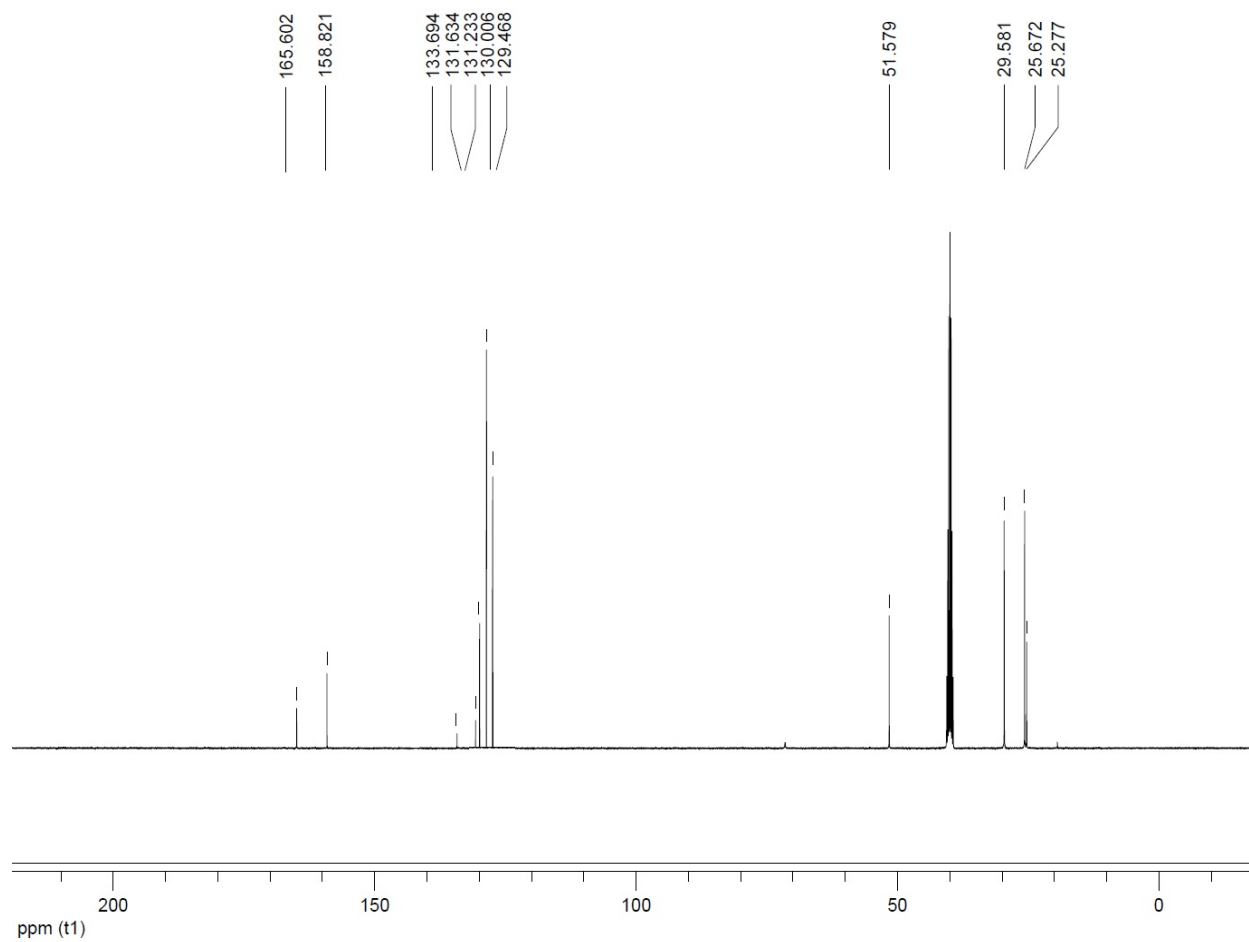

**Fig. S4.**  $^{13}\text{C}$ -NMR spectra (100 MHz,  $\text{DMSO-d}_6$ ) of 2-chloro-1,3-dicyclohexyl-4,5-dioximidazolidin-2-yl benzoate

**Benzyl benzoate (5a):**

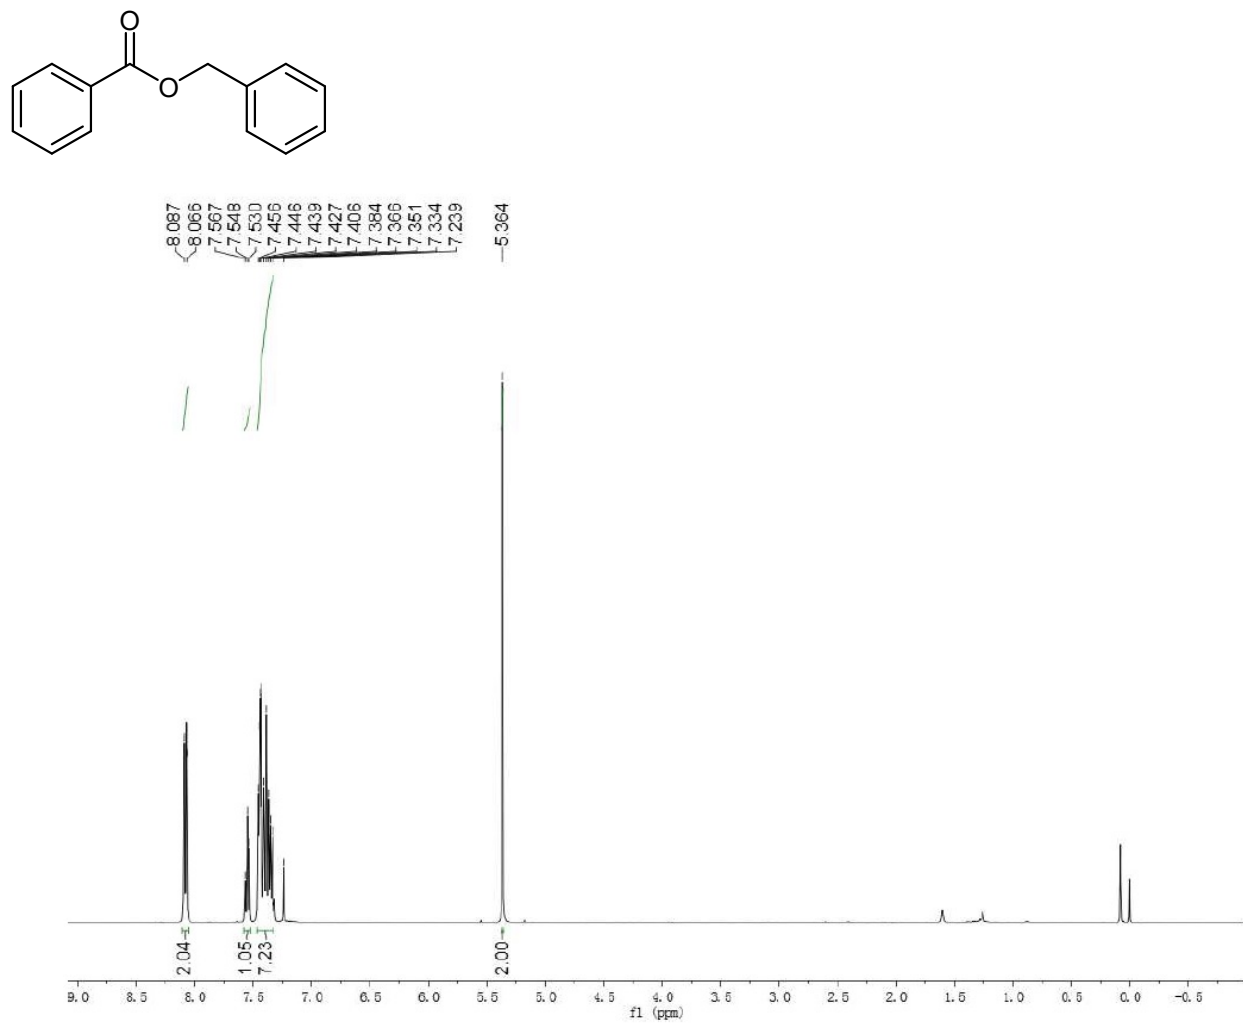

**Fig. S5.** <sup>1</sup>H-NMR spectra (400 MHz, CDCl<sub>3</sub>) of benzyl benzoate

**Benzyl benzoate (5a):**

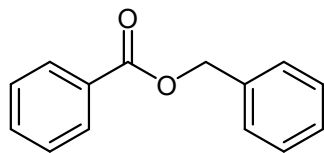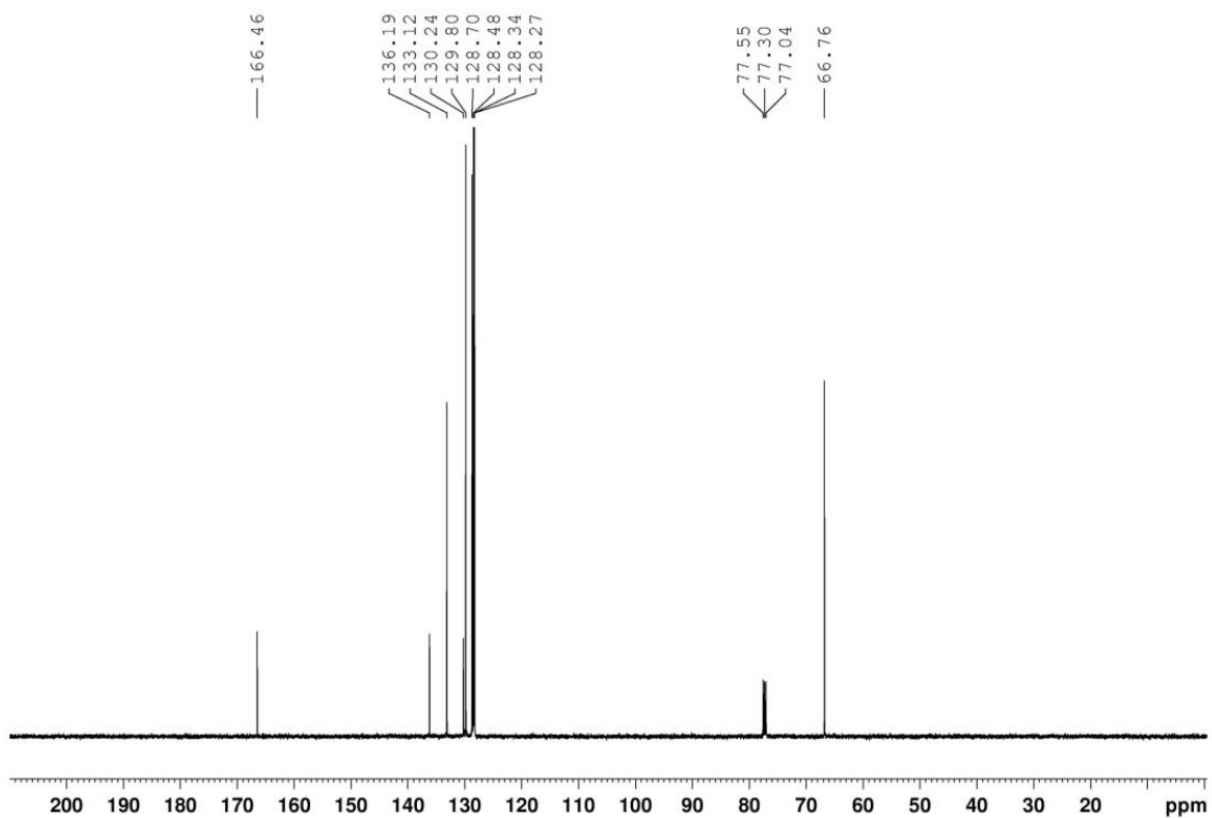

**Fig. S6.**  $^{13}\text{C}$ -NMR spectra (100 MHz,  $\text{CDCl}_3$ ) of benzyl benzoate

**2-Fluorobenzyl benzoate (5d):**

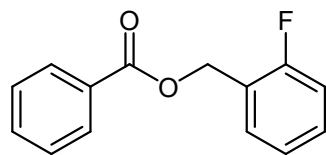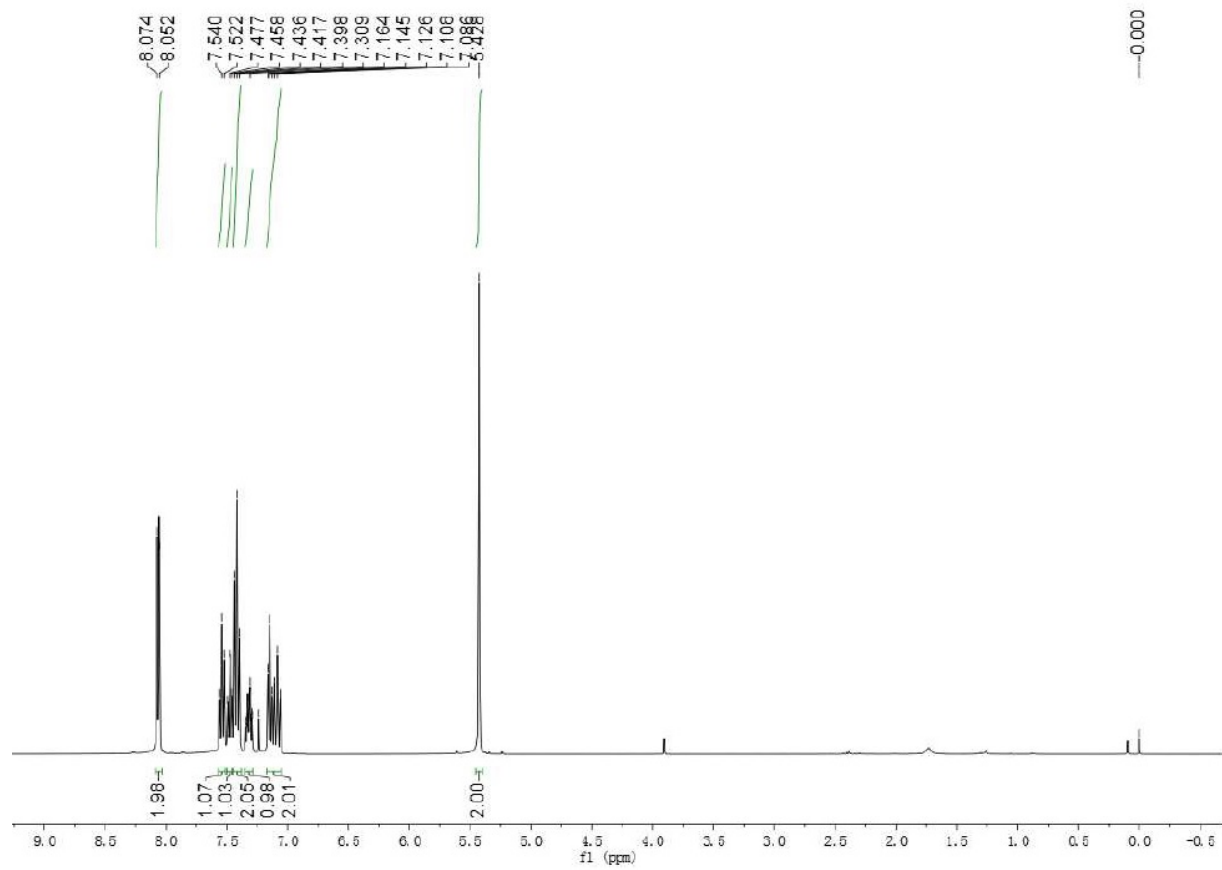

**Fig. S7.** <sup>1</sup>H-NMR spectra of (400 MHz, CDCl<sub>3</sub>) 2-Fluorobenzyl benzoate



**Ethyl benzoate (5f):**

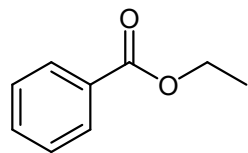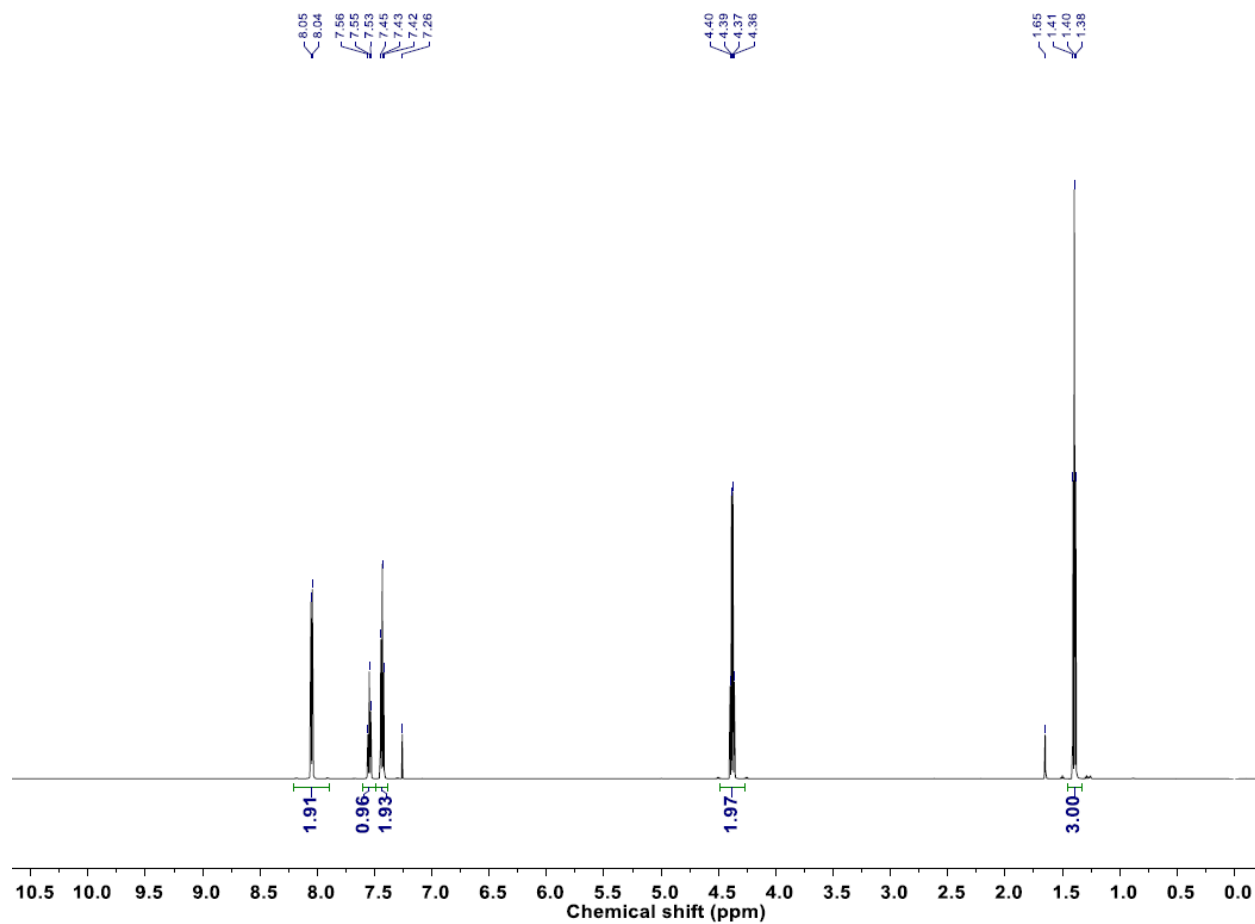

**Fig. S8.**  $^1\text{H-NMR}$  spectra (500 MHz,  $\text{CDCl}_3$ ) of Benzyl benzoate

**4-Chlorobenzyl 4-bromobenzoate (5i):**

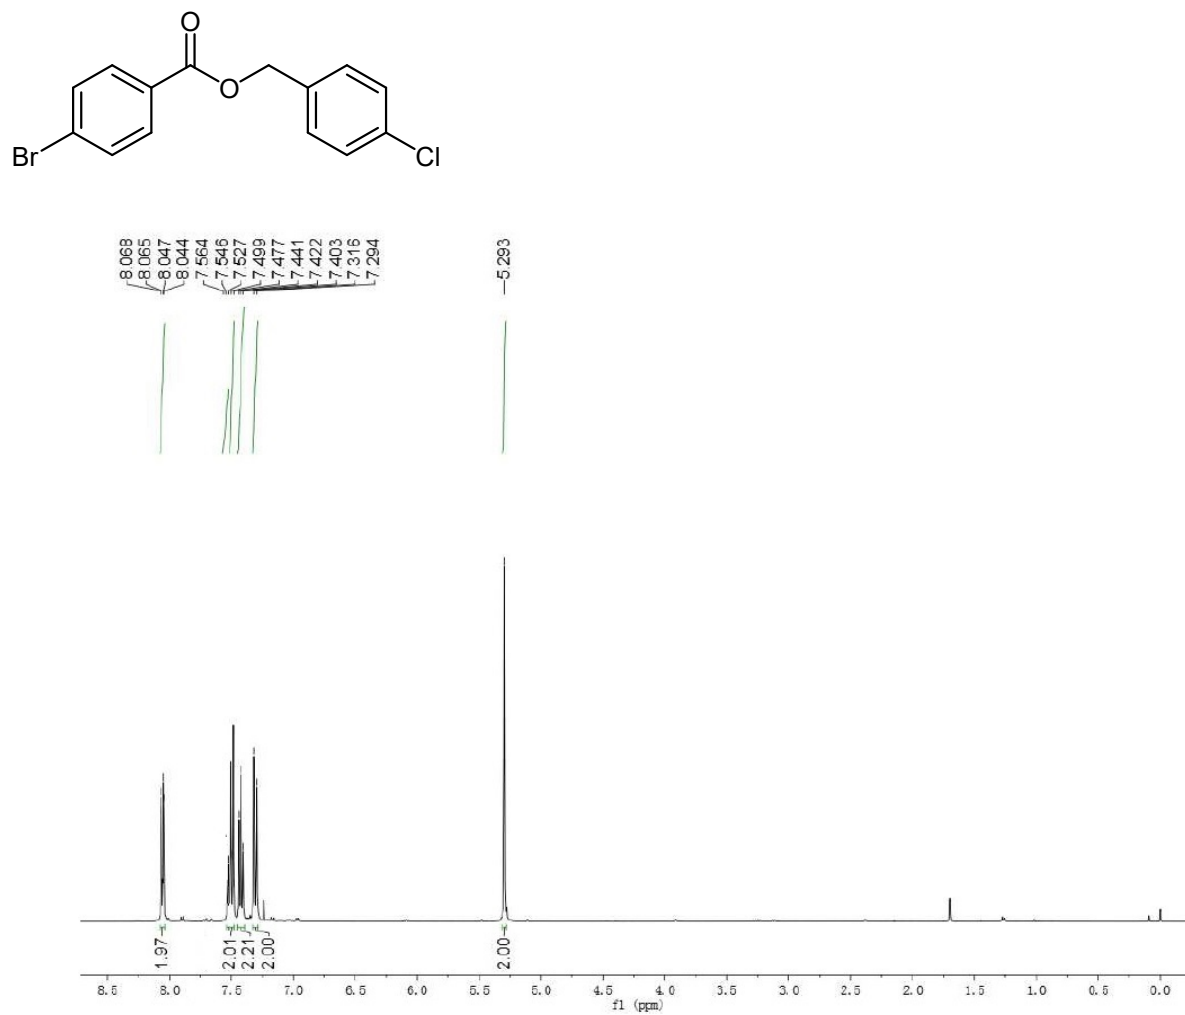

**Fig. S9.** <sup>1</sup>H-NMR spectra (400 MHz, CDCl<sub>3</sub>) of 4-Chlorobenzyl 4-bromobenzoate

**2-Fluorobenzyl 4-bromobenzoate (5j):**

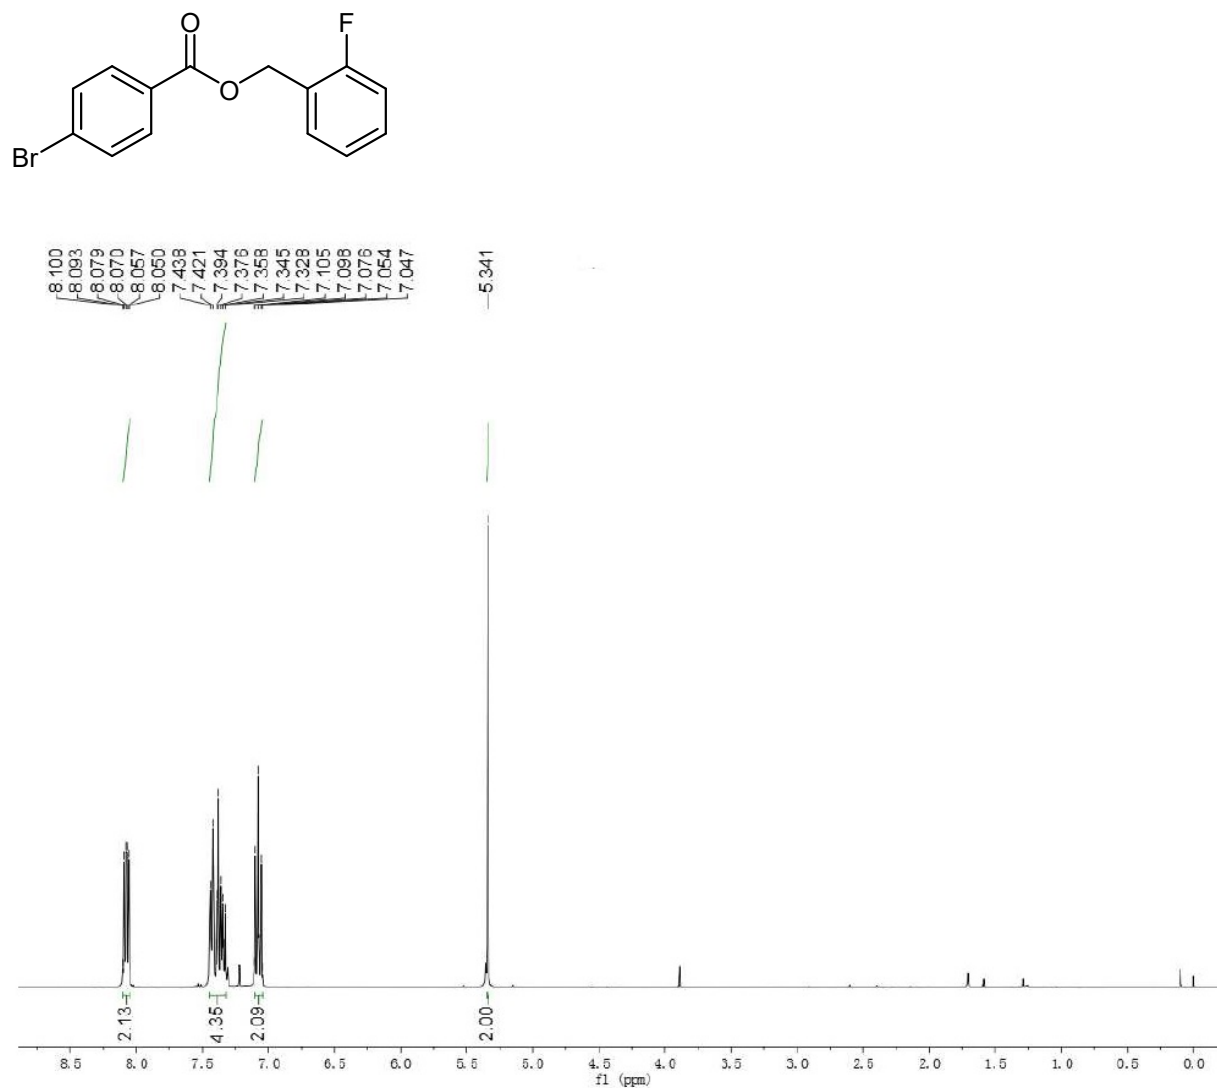

**Fig. S10.** <sup>1</sup>H-NMR spectra (400 MHz, CDCl<sub>3</sub>) of 2-Fluorobenzyl 4-bromobenzoate

**Benzyl 3-methylbenzoate (5k):**

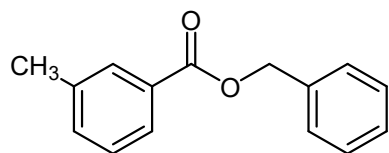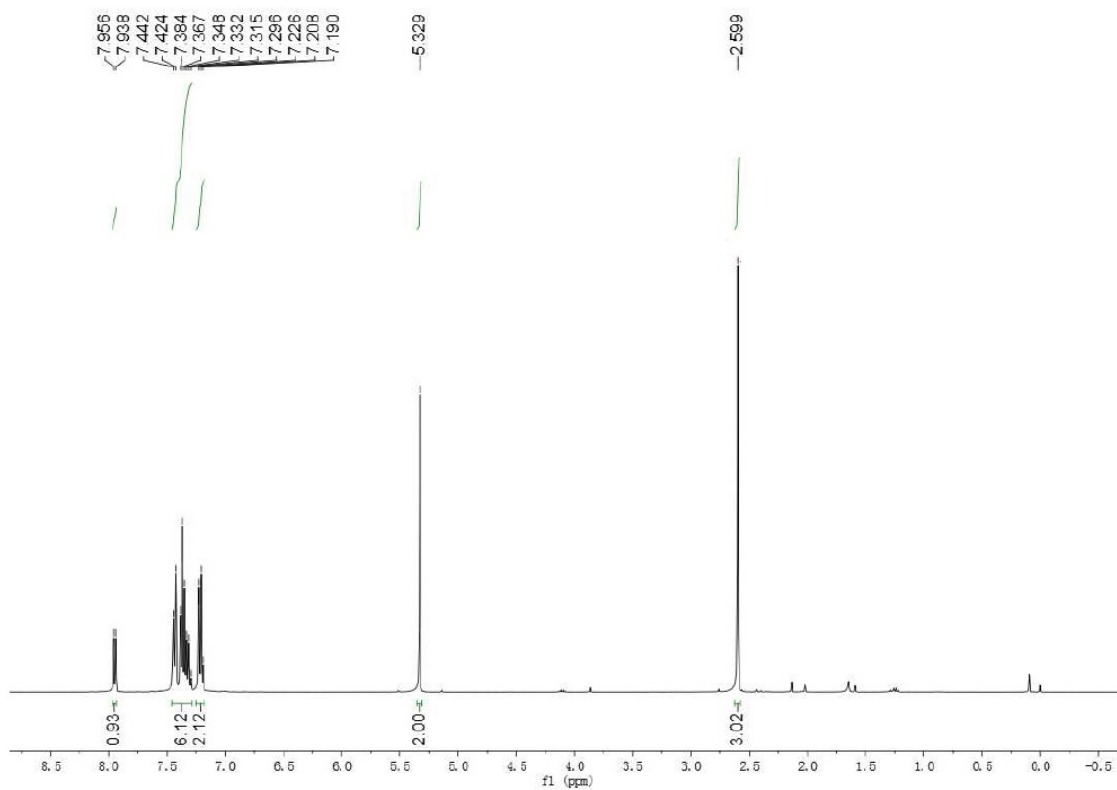

**Fig. S11.**  $^1\text{H-NMR}$  spectra (400 MHz,  $\text{CDCl}_3$ ) of Benzyl 3-methylbenzoate

**4-Chlorobenzyl 3-methylbenzoate (5m):**

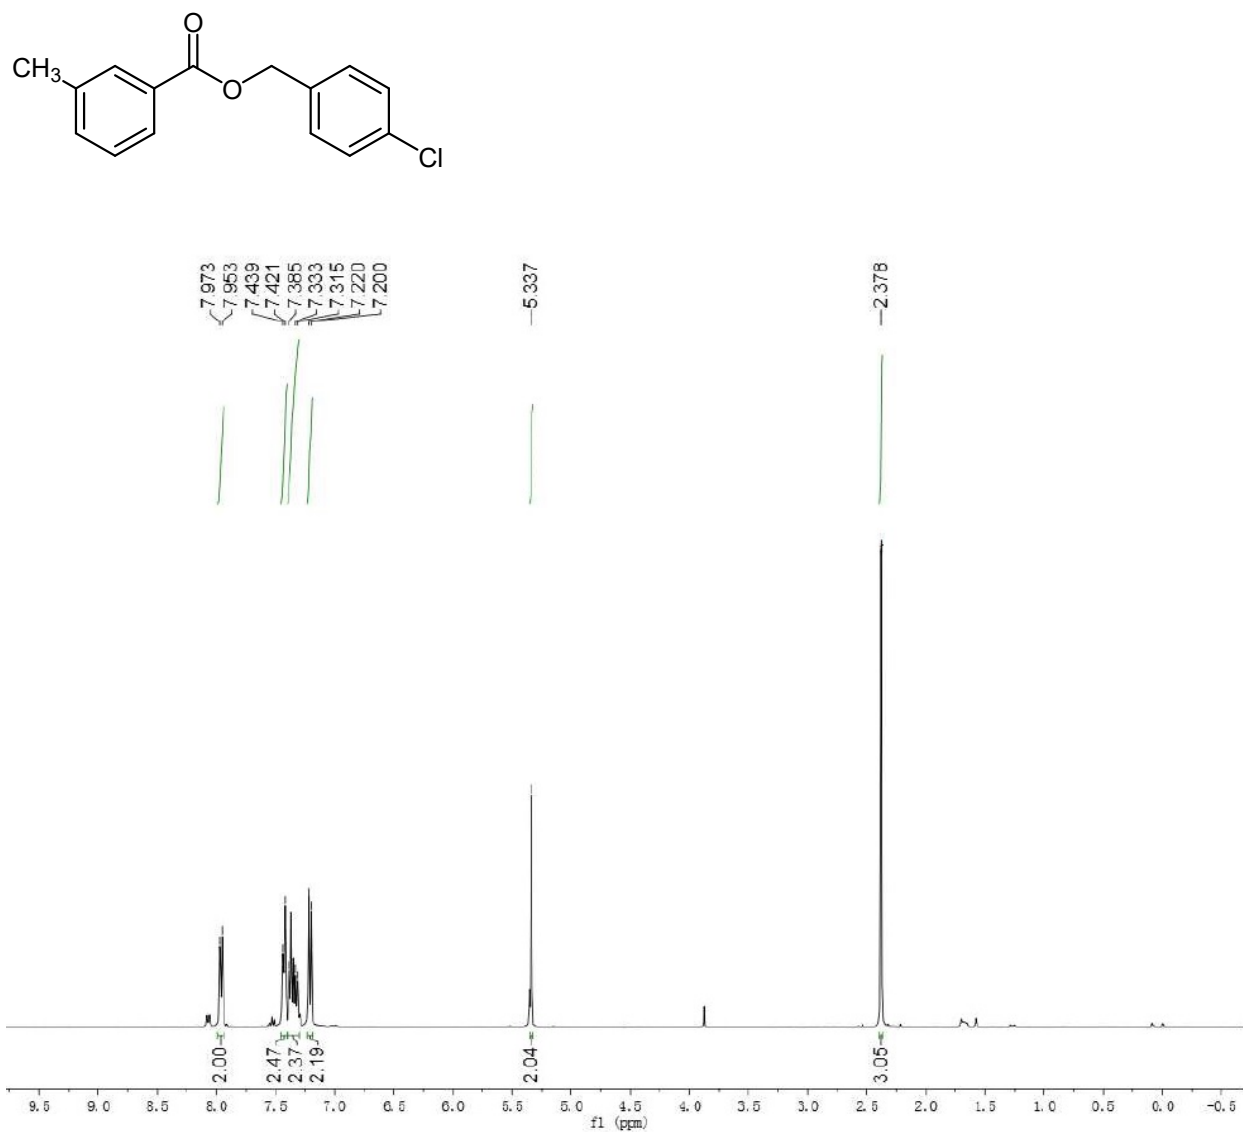

**Fig. S12.** <sup>1</sup>H-NMR spectra (400 MHz, CDCl<sub>3</sub>) of 4-Chlorobenzyl 3-methylbenzoate

**2-Fluorobenzyl 3-methylbenzoate (5n)**

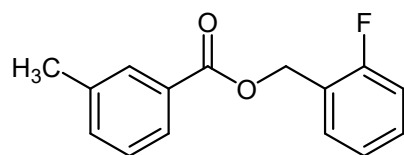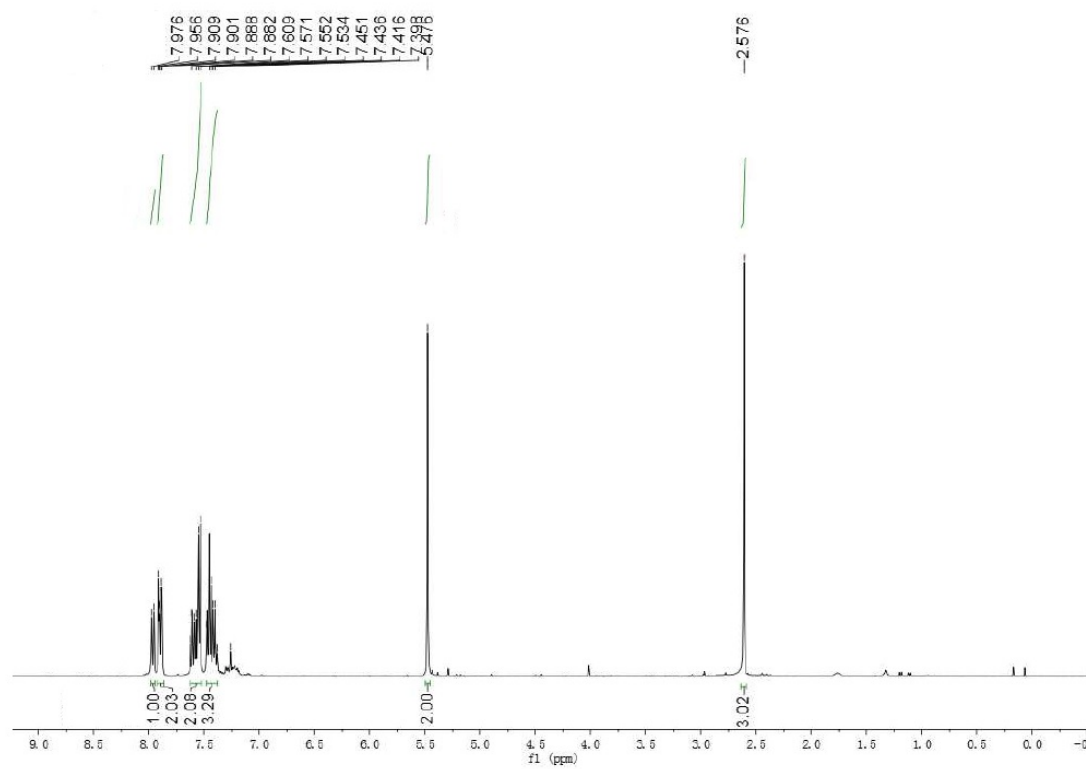

**Fig. S13.**  $^1\text{H-NMR}$  spectra (400 MHz,  $\text{CDCl}_3$ ) of 2-Fluorobenzyl 3-methylbenzoate

**Benzyl acetate (5s)**

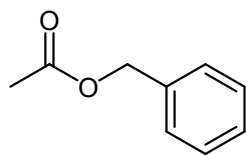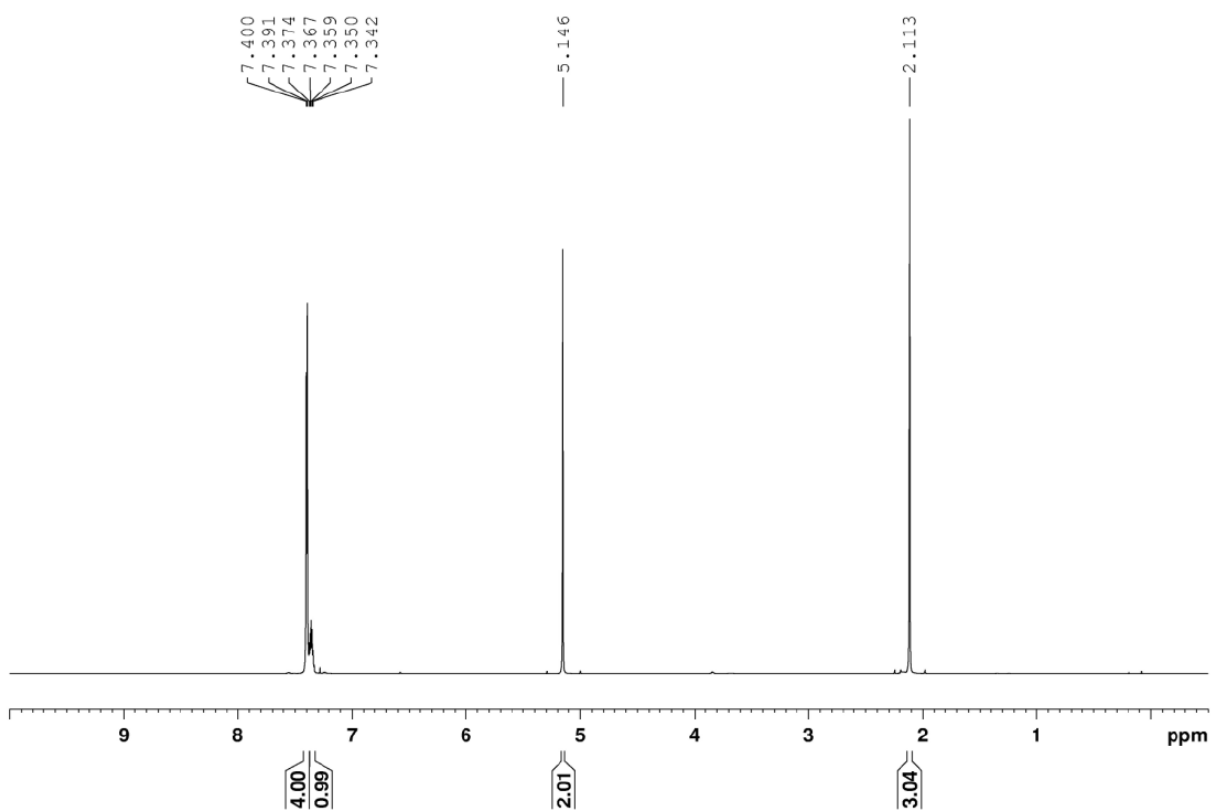

**Fig. S14.** <sup>1</sup>H-NMR spectra (400 MHz, CDCl<sub>3</sub>) of benzyl acetate

Benzyl propionate (5t)

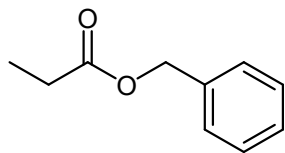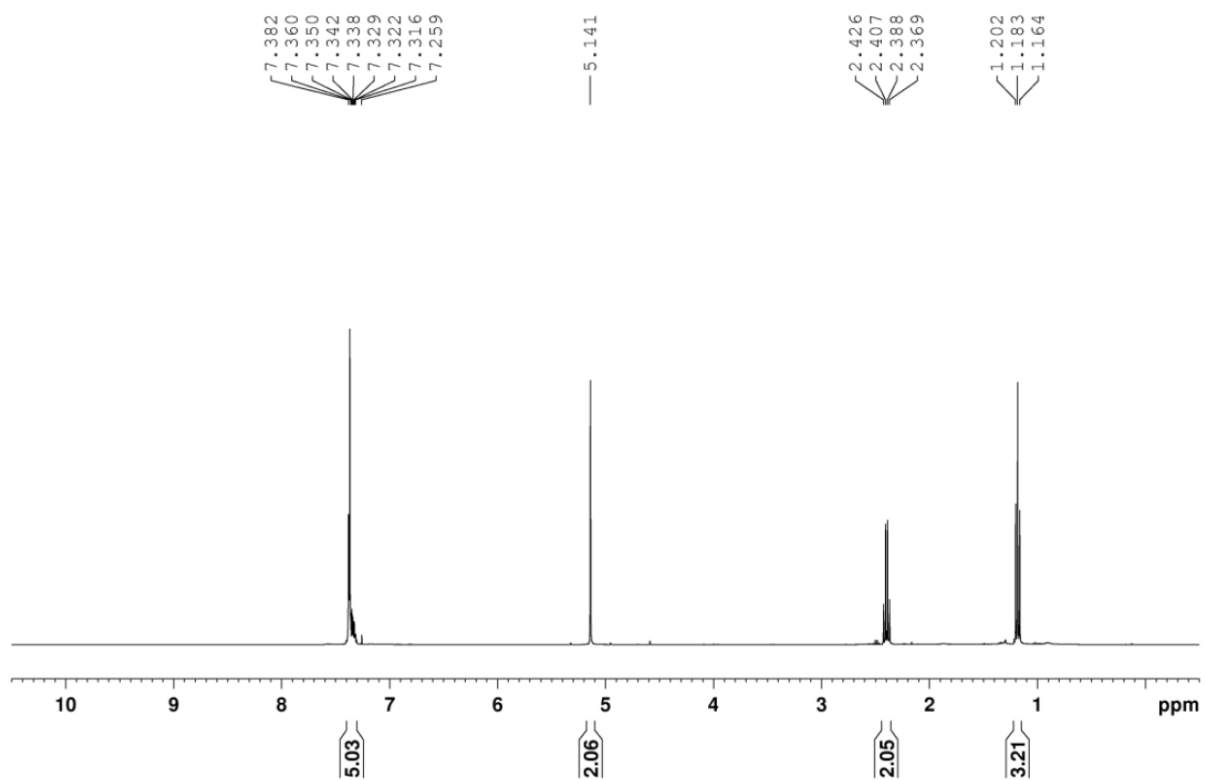

Fig. S15. <sup>1</sup>H-NMR spectra (400 MHz, CDCl<sub>3</sub>) of benzyl propionate



1,3-Dicyclohexylimidazolidine-2,4,5-trione (DCIT) :

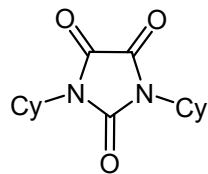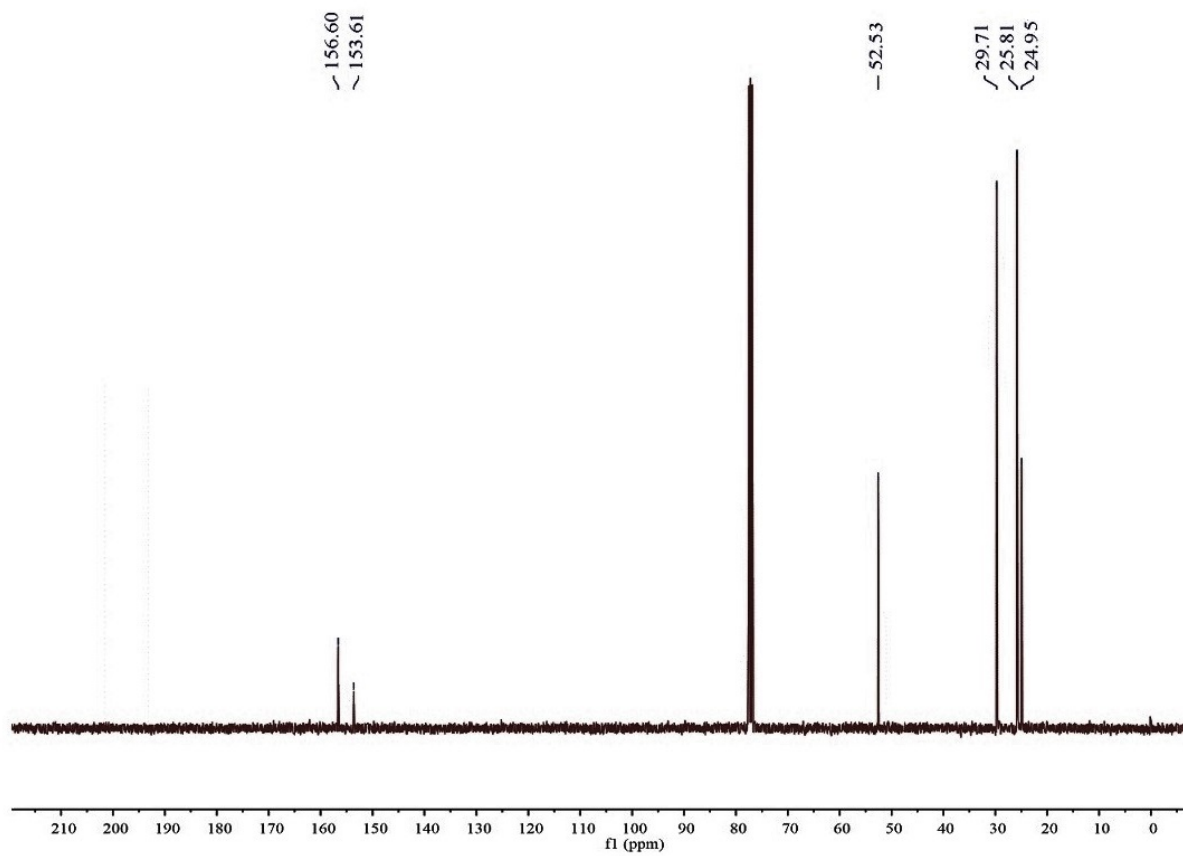

Fig. S16. <sup>1</sup>H-NMR spectra (400 MHz, CDCl<sub>3</sub>) of DCIT 7

1,3-Dicyclohexylimidazolidine-2,4,5-trione (DCIT):

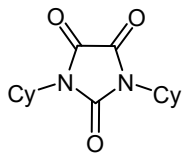

File : C:\MSDCHEM\3\DATA\Snapshot\30002171.D  
Operator :  
Acquired : 13 Apr 2023 10:11 using AcqMethod PAH  
Instrument : Instrumen  
Sample Name: intermediate  
Misc Info :  
Vial Number: 1

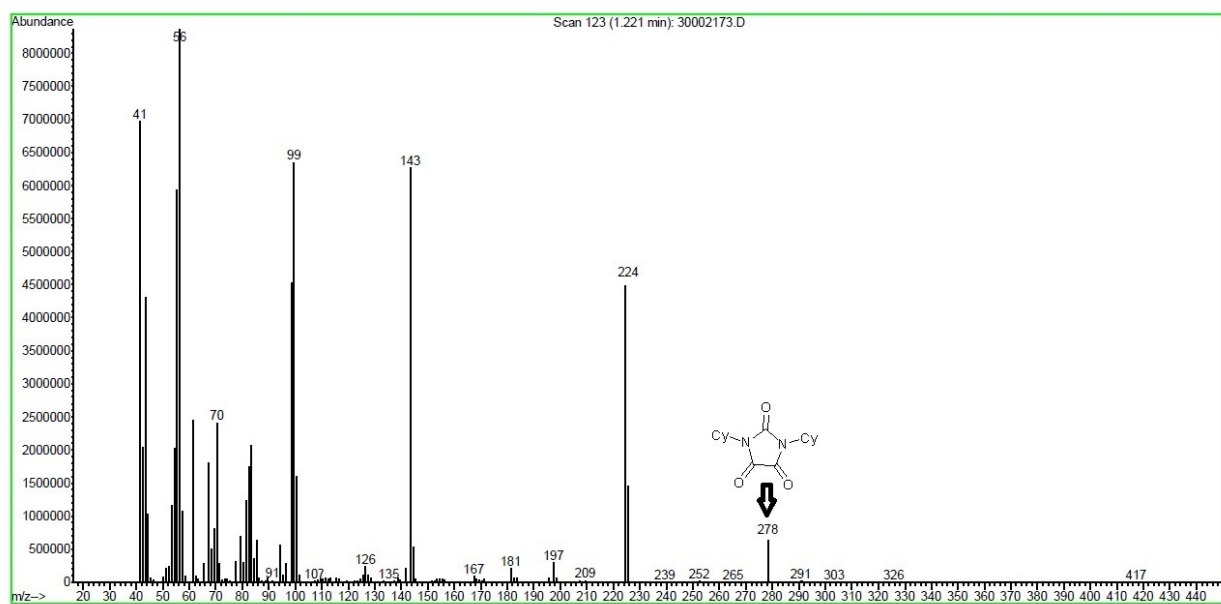

Fig. S17. Mass spectra of DCIT 7
